# Supplementary material
Source: publisher site journal article supplement (https://cdn.jamanetwork.com/ama/content_public/journal/psych/938559/yoi200029supp3_prod_1601309843.49394.pdf)
Supplement: Supplementary file 1 [file yoi200029supp3_prod_1601309843.49394.pdf]

Berk M. Effect of aspirin on the prevention of depression in older people: a double-blind, placebo-controlled randomized clinical trial. *JAMA Psychiatry*. Published online June 3, 2020. doi:10.1001/jamapsychiatry.2020.1214

## Data Sharing Statement

### Data

**Data available:** Yes

**Data types:** Deidentified participant data

**How to access data:** Requests for data access will be via the ASPREE Principal Investigators with details for applications provided through the web site, [www.ASPREE.org](http://www.ASPREE.org), and in accord with the NIH policy on data sharing, details available at

[https://grants.nih.gov/grants/policy/data\\_sharing/](https://grants.nih.gov/grants/policy/data_sharing/)

**When available:** With publication

### Supporting Documents

**Document types:** None

### Additional Information

**Who can access the data:** Investigators whose proposed use of the data has been approved by a review committee identified for this purpose.

**Types of analyses:** Analyses required to achieve aims in the approved proposal.

**Mechanisms of data availability:** Through a web-based data portal safe haven, based at Monash University, Australia.

**Any additional restrictions:** n/a
